# Supplementary material for: Effects of time pressure and time passage on face-matching accuracy
Source: R Soc Open Sci. 2017 Jun 7;4(6):170249. doi: 10.1098/rsos.170249 (PMC5493919; doi:10.1098/rsos.170249)
Supplement: Raw data [file rsos170249supp2.xlsx]

## Sheet: Exp1_Acc
	Time Pressure													Time Passage
	10		8		6		4		2					1		2		3		4		5
	Match	Mismatch	Match	Mismatch	Match	Mismatch	Match	Mismatch	Match	Mismatch				Match	Mismatch	Match	Mismatch	Match	Mismatch	Match	Mismatch	Match	Mismatch
Observer01	86.4865	66.6667	94.5946	33.3333	97.2973	0	94.5946	0	94.5946	0				86.4865	66.6667	94.5946	33.3333	97.2973	0	94.5946	0	94.5946	0
Observer02	62.1622	100	75.6757	33.3333	75.6757	0	94.5946	0	83.7838	33.3333				62.1622	100	75.6757	33.3333	75.6757	0	94.5946	0	83.7838	33.3333
Observer03	64.8649	66.6667	70.2703	100	75.6757	33.3333	83.7838	33.3333	75.6757	33.3333				64.8649	66.6667	70.2703	100	75.6757	33.3333	83.7838	33.3333	75.6757	33.3333
Observer04	81.0811	33.3333	86.4865	33.3333	89.1892	66.6667	91.8919	33.3333	97.2973	66.6667				81.0811	33.3333	86.4865	33.3333	89.1892	66.6667	91.8919	33.3333	97.2973	66.6667
Observer05	78.3784	66.6667	97.2973	33.3333	91.8919	0	97.2973	0	100	0				78.3784	66.6667	97.2973	33.3333	91.8919	0	97.2973	0	100	0
Observer06	78.3784	66.6667	86.4865	66.6667	81.0811	33.3333	89.1892	100	81.0811	33.3333				78.3784	66.6667	86.4865	66.6667	81.0811	33.3333	89.1892	100	81.0811	33.3333
Observer07	62.1622	66.6667	67.5676	33.3333	83.7838	33.3333	72.973	100	83.7838	66.6667				62.1622	66.6667	67.5676	33.3333	83.7838	33.3333	72.973	100	83.7838	66.6667
Observer08	86.4865	100	97.2973	33.3333	94.5946	0	91.8919	0	97.2973	0				86.4865	100	97.2973	33.3333	94.5946	0	91.8919	0	97.2973	0
Observer09	24.3243	100	40.5405	100	35.1351	100	56.7568	66.6667	62.1622	66.6667				24.3243	100	40.5405	100	35.1351	100	56.7568	66.6667	62.1622	66.6667
Observer10	94.5946	100	86.4865	33.3333	89.1892	100	91.8919	33.3333	89.1892	0				94.5946	100	86.4865	33.3333	89.1892	100	91.8919	33.3333	89.1892	0
Observer11	51.3514	100	70.2703	66.6667	72.973	66.6667	70.2703	66.6667	83.7838	33.3333				51.3514	100	70.2703	66.6667	72.973	66.6667	70.2703	66.6667	83.7838	33.3333
Observer12	86.4865	100	70.2703	33.3333	83.7838	33.3333	86.4865	33.3333	94.5946	0				86.4865	100	70.2703	33.3333	83.7838	33.3333	86.4865	33.3333	94.5946	0
Observer13	86.4865	66.6667	91.8919	66.6667	83.7838	66.6667	97.2973	66.6667	97.2973	33.3333				86.4865	66.6667	91.8919	66.6667	83.7838	66.6667	97.2973	66.6667	97.2973	33.3333
Observer14	89.1892	100	97.2973	33.3333	97.2973	100	97.2973	0	100	33.3333				89.1892	100	97.2973	33.3333	97.2973	100	97.2973	0	100	33.3333
Observer15	54.0541	100	56.7568	100	54.0541	100	70.2703	66.6667	67.5676	66.6667				54.0541	100	56.7568	100	54.0541	100	70.2703	66.6667	67.5676	66.6667
Observer16	56.7568	33.3333	78.3784	33.3333	67.5676	66.6667	81.0811	66.6667	83.7838	100				56.7568	33.3333	78.3784	33.3333	67.5676	66.6667	81.0811	66.6667	83.7838	100
Observer17	81.0811	66.6667	94.5946	66.6667	94.5946	33.3333	100	0	94.5946	0				81.0811	66.6667	94.5946	66.6667	94.5946	33.3333	100	0	94.5946	0
Observer18	86.4865	66.6667	86.4865	33.3333	91.8919	33.3333	97.2973	66.6667	100	33.3333				86.4865	66.6667	86.4865	33.3333	91.8919	33.3333	97.2973	66.6667	100	33.3333
Observer19	81.0811	33.3333	62.1622	33.3333	59.4595	100	83.7838	0	67.5676	33.3333				81.0811	33.3333	62.1622	33.3333	59.4595	100	83.7838	0	67.5676	33.3333
Observer20	75.6757	66.6667	83.7838	100	64.8649	66.6667	81.0811	100	83.7838	66.6667				75.6757	66.6667	83.7838	100	64.8649	66.6667	81.0811	100	83.7838	66.6667
Observer21	56.7568	66.6667	48.6486	66.6667	67.5676	100	45.9459	0	54.0541	100				56.7568	66.6667	48.6486	66.6667	67.5676	100	45.9459	0	54.0541	100
Observer22	78.3784	100	70.2703	66.6667	81.0811	66.6667	86.4865	33.3333	94.5946	0				78.3784	100	70.2703	66.6667	81.0811	66.6667	86.4865	33.3333	94.5946	0
Observer23	64.8649	66.6667	59.4595	66.6667	81.0811	100	78.3784	66.6667	78.3784	100				64.8649	66.6667	59.4595	66.6667	81.0811	100	78.3784	66.6667	78.3784	100
Observer24	81.0811	100	72.973	66.6667	81.0811	100	89.1892	66.6667	83.7838	100				81.0811	100	72.973	66.6667	81.0811	100	89.1892	66.6667	83.7838	100
Observer25	67.5676	33.3333	78.3784	100	67.5676	0	70.2703	66.6667	70.2703	66.6667				67.5676	33.3333	78.3784	100	67.5676	0	70.2703	66.6667	70.2703	66.6667
Observer26	48.6486	100	64.8649	66.6667	81.0811	33.3333	89.1892	66.6667	70.2703	66.6667				48.6486	100	64.8649	66.6667	81.0811	33.3333	89.1892	66.6667	70.2703	66.6667
Observer27	83.7838	100	75.6757	66.6667	70.2703	33.3333	78.3784	33.3333	81.0811	66.6667				83.7838	100	75.6757	66.6667	70.2703	33.3333	78.3784	33.3333	81.0811	66.6667
Observer28	72.973	66.6667	72.973	33.3333	75.6757	66.6667	75.6757	0	81.0811	66.6667				72.973	66.6667	72.973	33.3333	75.6757	66.6667	75.6757	0	81.0811	66.6667
Observer29	72.973	100	70.2703	66.6667	78.3784	66.6667	78.3784	100	72.973	33.3333				72.973	100	70.2703	66.6667	78.3784	66.6667	78.3784	100	72.973	33.3333
Observer30	62.1622	100	75.6757	100	70.2703	100	75.6757	66.6667	70.2703	33.3333				62.1622	100	75.6757	100	70.2703	100	75.6757	66.6667	70.2703	33.3333
Observer31	67.5676	66.6667	86.4865	66.6667	89.1892	66.6667	89.1892	66.6667	91.8919	66.6667				67.5676	66.6667	86.4865	66.6667	89.1892	66.6667	89.1892	66.6667	91.8919	66.6667
Observer32	67.5676	100	64.8649	66.6667	75.6757	66.6667	70.2703	66.6667	72.973	66.6667				67.5676	100	64.8649	66.6667	75.6757	66.6667	70.2703	66.6667	72.973	66.6667
Observer33	86.4865	66.6667	83.7838	33.3333	78.3784	66.6667	70.2703	0	89.1892	33.3333				86.4865	66.6667	83.7838	33.3333	78.3784	66.6667	70.2703	0	89.1892	33.3333
Observer34	78.3784	100	83.7838	100	86.4865	66.6667	89.1892	66.6667	83.7838	66.6667				78.3784	100	83.7838	100	86.4865	66.6667	89.1892	66.6667	83.7838	66.6667
Observer35	45.9459	100	45.9459	100	54.0541	100	43.2432	100	43.2432	33.3333				45.9459	100	45.9459	100	54.0541	100	43.2432	100	43.2432	33.3333
Observer36	67.5676	100	78.3784	100	78.3784	66.6667	62.1622	66.6667	81.0811	100				67.5676	100	78.3784	100	78.3784	66.6667	62.1622	66.6667	81.0811	100
Observer37	62.1622	33.3333	67.5676	66.6667	70.2703	100	70.2703	66.6667	78.3784	66.6667				62.1622	33.3333	67.5676	66.6667	70.2703	100	70.2703	66.6667	78.3784	66.6667
Observer38	89.1892	33.3333	91.8919	0	86.4865	0	94.5946	33.3333	97.2973	0				89.1892	33.3333	91.8919	0	86.4865	0	94.5946	33.3333	97.2973	0
Observer39	59.4595	66.6667	62.1622	66.6667	67.5676	66.6667	70.2703	33.3333	70.2703	66.6667				59.4595	66.6667	62.1622	66.6667	67.5676	66.6667	70.2703	33.3333	70.2703	66.6667
Observer40	75.6757	100	72.973	100	78.3784	33.3333	75.6757	33.3333	89.1892	33.3333				75.6757	100	72.973	100	78.3784	33.3333	75.6757	33.3333	89.1892	33.3333
Observer41	75.6757	100	64.8649	66.6667	67.5676	100	70.2703	66.6667	59.4595	100				59.4595	100	70.2703	66.6667	67.5676	100	64.8649	66.6667	75.6757	100
Observer42	89.1892	0	75.6757	0	72.973	66.6667	70.2703	0	45.9459	66.6667				45.9459	66.6667	70.2703	0	72.973	66.6667	75.6757	0	89.1892	0
Observer43	78.3784	100	72.973	33.3333	86.4865	66.6667	72.973	33.3333	62.1622	66.6667				62.1622	66.6667	72.973	33.3333	86.4865	66.6667	72.973	33.3333	78.3784	100
Observer44	91.8919	100	75.6757	33.3333	83.7838	100	67.5676	33.3333	67.5676	100				67.5676	100	67.5676	33.3333	83.7838	100	75.6757	33.3333	91.8919	100
Observer45	97.2973	66.6667	89.1892	0	97.2973	33.3333	94.5946	66.6667	78.3784	0				78.3784	0	94.5946	66.6667	97.2973	33.3333	89.1892	0	97.2973	66.6667
Observer46	86.4865	33.3333	75.6757	66.6667	78.3784	66.6667	78.3784	66.6667	64.8649	100				64.8649	100	78.3784	66.6667	78.3784	66.6667	75.6757	66.6667	86.4865	33.3333
Observer47	78.3784	66.6667	86.4865	33.3333	83.7838	66.6667	70.2703	100	64.8649	66.6667				64.8649	66.6667	70.2703	100	83.7838	66.6667	86.4865	33.3333	78.3784	66.6667
Observer48	40.5405	100	43.2432	66.6667	56.7568	66.6667	27.027	100	27.027	66.6667				27.027	66.6667	27.027	100	56.7568	66.6667	43.2432	66.6667	40.5405	100
Observer49	100	66.6667	86.4865	100	81.0811	66.6667	86.4865	33.3333	81.0811	0				81.0811	0	86.4865	33.3333	81.0811	66.6667	86.4865	100	100	66.6667
Observer50	97.2973	0	91.8919	0	91.8919	33.3333	94.5946	33.3333	91.8919	33.3333				91.8919	33.3333	94.5946	33.3333	91.8919	33.3333	91.8919	0	97.2973	0
Observer51	81.0811	33.3333	83.7838	0	97.2973	33.3333	75.6757	33.3333	62.1622	100				62.1622	100	75.6757	33.3333	97.2973	33.3333	83.7838	0	81.0811	33.3333
Observer52	94.5946	33.3333	91.8919	33.3333	83.7838	33.3333	86.4865	0	64.8649	66.6667				64.8649	66.6667	86.4865	0	83.7838	33.3333	91.8919	33.3333	94.5946	33.3333
Observer53	75.6757	100	72.973	66.6667	51.3514	100	72.973	33.3333	72.973	66.6667				72.973	66.6667	72.973	33.3333	51.3514	100	72.973	66.6667	75.6757	100
Observer54	62.1622	66.6667	78.3784	0	86.4865	0	86.4865	33.3333	54.0541	33.3333				54.0541	33.3333	86.4865	33.3333	86.4865	0	78.3784	0	62.1622	66.6667
Observer55	94.5946	66.6667	83.7838	33.3333	86.4865	100	70.2703	100	67.5676	100				67.5676	100	70.2703	100	86.4865	100	83.7838	33.3333	94.5946	66.6667
Observer56	91.8919	0	94.5946	33.3333	78.3784	33.3333	64.8649	100	48.6486	33.3333				48.6486	33.3333	64.8649	100	78.3784	33.3333	94.5946	33.3333	91.8919	0
Observer57	64.8649	66.6667	51.3514	33.3333	43.2432	66.6667	48.6486	100	48.6486	0				48.6486	0	48.6486	100	43.2432	66.6667	51.3514	33.3333	64.8649	66.6667
Observer58	83.7838	0	89.1892	66.6667	83.7838	0	59.4595	33.3333	64.8649	33.3333				64.8649	33.3333	59.4595	33.3333	83.7838	0	89.1892	66.6667	83.7838	0
Observer59	94.5946	0	75.6757	66.6667	81.0811	66.6667	72.973	66.6667	67.5676	100				67.5676	100	72.973	66.6667	81.0811	66.6667	75.6757	66.6667	94.5946	0
Observer60	29.7297	100	35.1351	100	27.027	100	32.4324	100	40.5405	100				40.5405	100	32.4324	100	27.027	100	35.1351	100	29.7297	100
Observer61	64.8649	66.6667	64.8649	100	70.2703	66.6667	54.0541	66.6667	51.3514	66.6667				51.3514	66.6667	54.0541	66.6667	70.2703	66.6667	64.8649	100	64.8649	66.6667
Observer62	83.7838	33.3333	83.7838	100	89.1892	33.3333	67.5676	66.6667	67.5676	66.6667				67.5676	66.6667	67.5676	66.6667	89.1892	33.3333	83.7838	100	83.7838	33.3333
Observer63	72.973	66.6667	62.1622	100	72.973	100	64.8649	100	48.6486	100				48.6486	100	64.8649	100	72.973	100	62.1622	100	72.973	66.6667
Observer64	64.8649	66.6667	72.973	100	81.0811	66.6667	62.1622	66.6667	59.4595	33.3333				59.4595	33.3333	62.1622	66.6667	81.0811	66.6667	72.973	100	64.8649	66.6667
Observer65	81.0811	100	83.7838	33.3333	78.3784	0	72.973	33.3333	64.8649	66.6667				64.8649	66.6667	72.973	33.3333	78.3784	0	83.7838	33.3333	81.0811	100
Observer66	24.3243	100	21.6216	66.6667	21.6216	100	13.5135	100	24.3243	100				24.3243	100	13.5135	100	21.6216	100	21.6216	66.6667	24.3243	100
Observer67	62.1622	100	78.3784	100	78.3784	66.6667	78.3784	33.3333	78.3784	100				78.3784	100	78.3784	33.3333	78.3784	66.6667	78.3784	100	62.1622	100
Observer68	75.6757	66.6667	94.5946	33.3333	83.7838	33.3333	75.6757	66.6667	67.5676	66.6667				67.5676	66.6667	75.6757	66.6667	83.7838	33.3333	94.5946	33.3333	75.6757	66.6667
Observer69	83.7838	100	70.2703	66.6667	83.7838	66.6667	72.973	66.6667	48.6486	100				48.6486	100	72.973	66.6667	83.7838	66.6667	70.2703	66.6667	83.7838	100
Observer70	89.1892	100	70.2703	100	64.8649	66.6667	72.973	100	54.0541	100				54.0541	100	72.973	100	64.8649	66.6667	70.2703	100	89.1892	100
Observer71	72.973	66.6667	67.5676	33.3333	67.5676	100	48.6486	66.6667	54.0541	100				54.0541	100	48.6486	66.6667	67.5676	100	67.5676	33.3333	72.973	66.6667
Observer72	91.8919	66.6667	97.2973	0	94.5946	100	89.1892	66.6667	78.3784	66.6667				78.3784	66.6667	89.1892	66.6667	94.5946	100	97.2973	0	91.8919	66.6667
Observer73	83.7838	66.6667	83.7838	66.6667	81.0811	66.6667	64.8649	66.6667	45.9459	100				45.9459	100	64.8649	66.6667	81.0811	66.6667	83.7838	66.6667	83.7838	66.6667
Observer74	97.2973	0	94.5946	0	86.4865	33.3333	81.0811	66.6667	62.1622	66.6667				62.1622	66.6667	81.0811	66.6667	86.4865	33.3333	94.5946	0	97.2973	0
Observer75	83.7838	66.6667	72.973	66.6667	83.7838	66.6667	37.8378	66.6667	43.2432	100				43.2432	100	37.8378	66.6667	83.7838	66.6667	72.973	66.6667	83.7838	66.6667
Observer76	89.1892	0	83.7838	33.3333	86.4865	66.6667	83.7838	100	83.7838	33.3333				83.7838	33.3333	83.7838	100	86.4865	66.6667	83.7838	33.3333	89.1892	0
Observer77	100	0	97.2973	0	94.5946	33.3333	91.8919	66.6667	83.7838	66.6667				83.7838	66.6667	91.8919	66.6667	94.5946	33.3333	97.2973	0	100	0
Observer78	100	66.6667	91.8919	33.3333	78.3784	66.6667	70.2703	33.3333	72.973	66.6667				72.973	66.6667	70.2703	33.3333	78.3784	66.6667	91.8919	33.3333	100	66.6667
Observer79	78.3784	33.3333	81.0811	66.6667	48.6486	33.3333	78.3784	66.6667	59.4595	66.6667				59.4595	66.6667	78.3784	66.6667	48.6486	33.3333	81.0811	66.6667	78.3784	33.3333
Observer80	89.1892	66.6667	75.6757	66.6667	72.973	100	72.973	66.6667	51.3514	100				51.3514	100	72.973	66.6667	72.973	100	75.6757	66.6667	89.1892	66.6667
	Time Pressure					Time Passage
	10	8	6	4	2	1	2	3	4	5
Match	75.6757	76.1149	76.7568	74.8649	71.5878	66.1486	72.2297	76.7568	78.75	81.1149
Mismatch	67.9167	55.8333	60	54.5833	58.3333	73.75	62.0833	60	48.3333	52.5
SE	1.87323	3.5797	1.70693	3.5467	1.69549	3.57755	1.88822	3.56986	1.96418	3.72678
	1.89202	3.62527	1.71237	3.58029	1.69678	3.54054	1.89548	3.54698	1.96722	3.69943

## Sheet: Exp1_RT
	Time Pressure													Time Passage
	10		8		6		4		2					1		2		3		4		5
	Match	Mismatch	Match	Mismatch	Match	Mismatch	Match	Mismatch	Match	Mismatch				Match	Mismatch	Match	Mismatch	Match	Mismatch	Match	Mismatch	Match	Mismatch
Observer01	4.96834	13.1684	4.35298	11.4588	3.22707	.	2.17874	.	1.66813	.				4.96834	13.1684	4.35298	11.4588	3.22707	.	2.17874	.	1.66813	.
Observer02	3.57335	2.7516	3.04806	3.83303	2.39264	.	2.45937	.	1.72297	1.63811				3.57335	2.7516	3.04806	3.83303	2.39264	.	2.45937	.	1.72297	1.63811
Observer03	4.50304	4.53982	4.42398	4.33675	4.13689	3.08867	3.0131	2.10576	1.68524	2.51173				4.50304	4.53982	4.42398	4.33675	4.13689	3.08867	3.0131	2.10576	1.68524	2.51173
Observer04	2.02273	2.37102	1.6995	2.27747	1.72454	2.37885	1.65613	1.59138	0.995401	1.19351				2.02273	2.37102	1.6995	2.27747	1.72454	2.37885	1.65613	1.59138	0.995401	1.19351
Observer05	2.96121	7.30118	1.83382	2.99032	2.01652	.	1.53984	.	1.88864	.				2.96121	7.30118	1.83382	2.99032	2.01652	.	1.53984	.	1.88864	.
Observer06	4.71827	12.2144	3.55272	6.81705	3.79124	4.78933	2.84946	2.32969	1.36255	1.34156				4.71827	12.2144	3.55272	6.81705	3.79124	4.78933	2.84946	2.32969	1.36255	1.34156
Observer07	3.76817	3.98582	3.15336	4.52401	2.87724	4.52412	2.38629	2.09038	1.5887	1.69252				3.76817	3.98582	3.15336	4.52401	2.87724	4.52412	2.38629	2.09038	1.5887	1.69252
Observer08	3.23128	5.47041	3.14676	13.0569	3.17546	.	1.99846	.	1.49192	.				3.23128	5.47041	3.14676	13.0569	3.17546	.	1.99846	.	1.49192	.
Observer09	1.69349	3.00052	1.94431	1.18916	2.1964	2.35934	3.05356	2.48045	2.13883	1.46708				1.69349	3.00052	1.94431	1.18916	2.1964	2.35934	3.05356	2.48045	2.13883	1.46708
Observer10	1.83073	2.57924	2.43053	2.58957	2.09711	3.9468	1.54403	6.5673	1.52474	.				1.83073	2.57924	2.43053	2.58957	2.09711	3.9468	1.54403	6.5673	1.52474	.
Observer11	6.78079	9.72375	5.96474	8.51708	5.02948	5.91223	3.38862	3.41626	1.6693	1.5132				6.78079	9.72375	5.96474	8.51708	5.02948	5.91223	3.38862	3.41626	1.6693	1.5132
Observer12	3.63142	4.21039	4.23576	4.71124	2.87049	7.22258	2.60673	5.4755	1.71822	.				3.63142	4.21039	4.23576	4.71124	2.87049	7.22258	2.60673	5.4755	1.71822	.
Observer13	3.32455	2.40251	3.42437	3.65037	3.12454	2.8703	2.64096	3.11216	1.43275	1.09219				3.32455	2.40251	3.42437	3.65037	3.12454	2.8703	2.64096	3.11216	1.43275	1.09219
Observer14	2.57819	3.55183	3.28409	4.3836	3.52744	8.18996	3.27307	.	1.72064	2.99534				2.57819	3.55183	3.28409	4.3836	3.52744	8.18996	3.27307	.	1.72064	2.99534
Observer15	1.54292	1.368	1.6448	1.66411	1.68501	1.5444	1.33527	1.71601	1.1133	1.04495				1.54292	1.368	1.6448	1.66411	1.68501	1.5444	1.33527	1.71601	1.1133	1.04495
Observer16	3.43013	3.32284	3.84613	12.745	4.33614	5.24928	3.75939	4.38355	1.78849	1.20639				3.43013	3.32284	3.84613	12.745	4.33614	5.24928	3.75939	4.38355	1.78849	1.20639
Observer17	3.75378	1.69275	4.08258	7.29771	3.00673	4.05614	2.06656	.	1.42289	.				3.75378	1.69275	4.08258	7.29771	3.00673	4.05614	2.06656	.	1.42289	.
Observer18	2.90218	5.16368	2.36601	5.74077	3.1155	8.47067	2.29531	4.82056	1.943	2.68325				2.90218	5.16368	2.36601	5.74077	3.1155	8.47067	2.29531	4.82056	1.943	2.68325
Observer19	1.03018	1.04558	0.770644	1.09186	1.09539	1.46121	1.26876	.	1.31066	1.26332				1.03018	1.04558	0.770644	1.09186	1.09539	1.46121	1.26876	.	1.31066	1.26332
Observer20	4.29363	5.18687	6.2328	6.62371	5.08832	3.98396	3.32102	4.12871	1.87325	2.75541				4.29363	5.18687	6.2328	6.62371	5.08832	3.98396	3.32102	4.12871	1.87325	2.75541
Observer21	7.31776	2.5039	5.10558	3.65052	3.54993	5.46409	2.6876	.	1.64746	1.3937				7.31776	2.5039	5.10558	3.65052	3.54993	5.46409	2.6876	.	1.64746	1.3937
Observer22	1.82552	1.41461	2.1015	6.29459	1.40345	1.85643	1.24063	1.20152	0.949612	.				1.82552	1.41461	2.1015	6.29459	1.40345	1.85643	1.24063	1.20152	0.949612	.
Observer23	1.23182	1.20894	0.960561	1.00653	1.1312	1.13373	1.17443	1.06875	0.986611	1.07646				1.23182	1.20894	0.960561	1.00653	1.1312	1.13373	1.17443	1.06875	0.986611	1.07646
Observer24	2.37973	2.08379	3.01774	4.90611	1.84549	2.95868	1.81926	1.44056	1.31617	1.64661				2.37973	2.08379	3.01774	4.90611	1.84549	2.95868	1.81926	1.44056	1.31617	1.64661
Observer25	4.98295	8.3436	4.3703	4.31875	3.8163	.	2.60954	3.33675	1.55789	1.43519				4.98295	8.3436	4.3703	4.31875	3.8163	.	2.60954	3.33675	1.55789	1.43519
Observer26	2.66621	2.71138	3.94793	3.82191	3.57031	1.49773	3.1572	5.30389	1.67822	2.03586				2.66621	2.71138	3.94793	3.82191	3.57031	1.49773	3.1572	5.30389	1.67822	2.03586
Observer27	1.98637	1.86689	2.59742	2.18613	1.54064	1.70037	1.52452	2.15267	1.3349	2.21519				1.98637	1.86689	2.59742	2.18613	1.54064	1.70037	1.52452	2.15267	1.3349	2.21519
Observer28	3.17383	1.80989	2.88362	2.40231	2.41468	3.02397	2.11139	.	1.44433	1.02157				3.17383	1.80989	2.88362	2.40231	2.41468	3.02397	2.11139	.	1.44433	1.02157
Observer29	3.93392	3.47361	3.98662	2.33994	3.55631	6.5051	2.11766	3.02132	1.31784	1.92965				3.93392	3.47361	3.98662	2.33994	3.55631	6.5051	2.11766	3.02132	1.31784	1.92965
Observer30	2.2849	3.4796	3.7744	3.56856	4.4479	3.59844	2.46952	1.7628	1.87883	2.13736				2.2849	3.4796	3.7744	3.56856	4.4479	3.59844	2.46952	1.7628	1.87883	2.13736
Observer31	1.30377	3.31434	1.61965	2.37902	1.44778	2.05154	1.49383	2.38415	1.05448	1.40563				1.30377	3.31434	1.61965	2.37902	1.44778	2.05154	1.49383	2.38415	1.05448	1.40563
Observer32	6.2771	2.9167	3.80376	4.75789	2.42328	2.23413	1.99905	2.76751	1.30516	1.20814				6.2771	2.9167	3.80376	4.75789	2.42328	2.23413	1.99905	2.76751	1.30516	1.20814
Observer33	1.94482	2.9014	1.82407	4.39908	1.61369	4.02202	1.48552	.	0.976306	1.06101				1.94482	2.9014	1.82407	4.39908	1.61369	4.02202	1.48552	.	0.976306	1.06101
Observer34	4.4456	14.2007	4.91499	4.98302	3.07908	4.26046	3.00657	5.36638	1.59769	2.76114				4.4456	14.2007	4.91499	4.98302	3.07908	4.26046	3.00657	5.36638	1.59769	2.76114
Observer35	1.33853	1.17539	1.36278	1.4475	1.67965	1.54963	1.35702	1.51332	1.38819	1.07656				1.33853	1.17539	1.36278	1.4475	1.67965	1.54963	1.35702	1.51332	1.38819	1.07656
Observer36	2.62282	2.46993	4.03987	4.95038	3.72818	3.35401	3.8017	2.46492	1.66817	1.8408				2.62282	2.46993	4.03987	4.95038	3.72818	3.35401	3.8017	2.46492	1.66817	1.8408
Observer37	4.78501	11.3256	3.87893	3.21357	4.37087	3.10475	2.75436	1.85651	1.0249	2.92508				4.78501	11.3256	3.87893	3.21357	4.37087	3.10475	2.75436	1.85651	1.0249	2.92508
Observer38	0.958838	0.998581	0.995944	.	1.14709	.	0.980083	1.62251	0.801706	.				0.958838	0.998581	0.995944	.	1.14709	.	0.980083	1.62251	0.801706	.
Observer39	2.30898	2.41811	3.37143	3.26832	2.27116	1.89557	1.94462	1.93455	1.07662	1.28709				2.30898	2.41811	3.37143	3.26832	2.27116	1.89557	1.94462	1.93455	1.07662	1.28709
Observer40	5.24528	5.0961	3.50651	5.51984	2.20437	8.96996	2.76401	1.5757	1.55442	2.7774				5.24528	5.0961	3.50651	5.51984	2.20437	8.96996	2.76401	1.5757	1.55442	2.7774
Observer41	1.43658	1.4872	1.51589	1.46617	1.37565	1.29993	1.4534	1.80969	1.50425	1.12316				1.50425	1.12316	1.4534	1.80969	1.37565	1.29993	1.51589	1.46617	1.43658	1.4872
Observer42	1.12135	.	1.1297	.	1.16836	1.34165	1.3166	.	1.15987	1.1934				1.15987	1.1934	1.3166	.	1.16836	1.34165	1.1297	.	1.12135	.
Observer43	2.07519	3.57202	2.91319	1.46634	2.32918	4.01216	2.08113	4.26393	1.66739	1.49734				1.66739	1.49734	2.08113	4.26393	2.32918	4.01216	2.91319	1.46634	2.07519	3.57202
Observer44	4.43633	2.88606	3.48046	4.2092	2.74273	5.43736	2.16304	2.90167	1.59392	2.23085				1.59392	2.23085	2.16304	2.90167	2.74273	5.43736	3.48046	4.2092	4.43633	2.88606
Observer45	1.34045	3.54911	1.61626	.	1.12138	1.34178	1.25893	1.69041	1.40333	.				1.40333	.	1.25893	1.69041	1.12138	1.34178	1.61626	.	1.34045	3.54911
Observer46	2.41099	3.01089	2.13754	1.87997	2.39137	2.69093	1.5354	2.58182	1.56249	2.13414				1.56249	2.13414	1.5354	2.58182	2.39137	2.69093	2.13754	1.87997	2.41099	3.01089
Observer47	1.71608	1.87985	1.39331	1.38841	1.68678	2.70644	1.57632	1.48201	1.38087	1.10032				1.38087	1.10032	1.57632	1.48201	1.68678	2.70644	1.39331	1.38841	1.71608	1.87985
Observer48	1.8158	2.25519	1.41067	1.48461	1.17692	0.920362	1.30064	1.08649	1.13962	1.04535				1.13962	1.04535	1.30064	1.08649	1.17692	0.920362	1.41067	1.48461	1.8158	2.25519
Observer49	1.63478	3.82202	1.93871	2.90697	1.93843	2.86203	1.61442	1.66917	1.30619	.				1.30619	.	1.61442	1.66917	1.93843	2.86203	1.93871	2.90697	1.63478	3.82202
Observer50	1.84789	.	1.69573	.	1.46846	3.15106	1.51204	2.49619	1.18696	1.62232				1.18696	1.62232	1.51204	2.49619	1.46846	3.15106	1.69573	.	1.84789	.
Observer51	2.97469	3.67046	2.78609	.	2.60798	1.29467	2.62296	1.44527	1.82161	1.66416				1.82161	1.66416	2.62296	1.44527	2.60798	1.29467	2.78609	.	2.97469	3.67046
Observer52	2.1361	5.14776	1.93286	8.34564	2.352	3.19795	2.46858	.	1.80573	1.15975				1.80573	1.15975	2.46858	.	2.352	3.19795	1.93286	8.34564	2.1361	5.14776
Observer53	2.0374	2.3971	2.38761	2.20726	1.66384	1.83401	1.11846	1.72756	1.20489	1.3331				1.20489	1.3331	1.11846	1.72756	1.66384	1.83401	2.38761	2.20726	2.0374	2.3971
Observer54	1.53426	1.5365	1.24271	.	1.36054	.	1.38348	1.37281	1.4014	1.6535				1.4014	1.6535	1.38348	1.37281	1.36054	.	1.24271	.	1.53426	1.5365
Observer55	2.18576	1.5374	2.77648	1.68526	2.00444	1.93961	2.33593	3.80641	1.46021	1.19933				1.46021	1.19933	2.33593	3.80641	2.00444	1.93961	2.77648	1.68526	2.18576	1.5374
Observer56	1.75433	.	1.6273	1.56032	1.52438	1.41961	1.60903	1.73185	2.04662	1.03466				2.04662	1.03466	1.60903	1.73185	1.52438	1.41961	1.6273	1.56032	1.75433	.
Observer57	8.68087	8.14633	6.97121	4.94515	4.10152	5.43096	2.69101	4.41992	1.77657	.				1.77657	.	2.69101	4.41992	4.10152	5.43096	6.97121	4.94515	8.68087	8.14633
Observer58	1.35778	.	2.19351	3.32279	2.10202	.	1.51845	1.10791	1.05579	1.27939				1.05579	1.27939	1.51845	1.10791	2.10202	.	2.19351	3.32279	1.35778	.
Observer59	2.36963	.	4.09725	4.21977	2.70032	6.38818	2.69798	4.29785	1.59838	1.44562				1.59838	1.44562	2.69798	4.29785	2.70032	6.38818	4.09725	4.21977	2.36963	.
Observer60	2.30889	1.58615	1.99686	2.14761	1.5944	2.87083	1.81355	1.84607	1.84314	1.1181				1.84314	1.1181	1.81355	1.84607	1.5944	2.87083	1.99686	2.14761	2.30889	1.58615
Observer61	1.27601	1.68509	1.37484	1.41467	1.11791	1.25583	1.43141	1.20902	1.50942	1.38842				1.50942	1.38842	1.43141	1.20902	1.11791	1.25583	1.37484	1.41467	1.27601	1.68509
Observer62	3.24116	5.13249	3.24485	5.09087	2.96798	1.37289	2.297	2.41814	1.64311	1.38847				1.64311	1.38847	2.297	2.41814	2.96798	1.37289	3.24485	5.09087	3.24116	5.13249
Observer63	1.7699	1.34159	2.58356	1.61209	2.7498	1.56525	2.17815	1.88771	1.68769	1.3209				1.68769	1.3209	2.17815	1.88771	2.7498	1.56525	2.58356	1.61209	1.7699	1.34159
Observer64	2.23915	1.30273	2.82205	2.42329	2.12147	2.09866	1.94988	2.68326	1.27147	1.04533				1.27147	1.04533	1.94988	2.68326	2.12147	2.09866	2.82205	2.42329	2.23915	1.30273
Observer65	2.57031	4.99145	4.14088	3.47218	2.16391	.	1.86708	1.38459	1.35547	1.75779				1.35547	1.75779	1.86708	1.38459	2.16391	.	4.14088	3.47218	2.57031	4.99145
Observer66	2.14013	0.717839	2.00901	1.09286	1.74139	1.35763	1.17967	0.982921	2.57592	0.946477				2.57592	0.946477	1.17967	0.982921	1.74139	1.35763	2.00901	1.09286	2.14013	0.717839
Observer67	2.38486	2.17357	1.87917	1.47171	1.72522	2.76904	1.7188	1.26361	1.01891	1.39887				1.01891	1.39887	1.7188	1.26361	1.72522	2.76904	1.87917	1.47171	2.38486	2.17357
Observer68	1.83372	1.90327	1.79214	2.51163	1.62988	2.15283	1.54152	1.63016	1.5233	1.02969				1.5233	1.02969	1.54152	1.63016	1.62988	2.15283	1.79214	2.51163	1.83372	1.90327
Observer69	6.28794	11.7312	5.10362	6.07777	3.84504	2.84703	2.85324	1.91889	2.00301	1.36254				2.00301	1.36254	2.85324	1.91889	3.84504	2.84703	5.10362	6.07777	6.28794	11.7312
Observer70	1.12939	1.06638	1.34973	1.26883	1.26548	1.49029	1.37547	1.0349	2.26597	1.30006				2.26597	1.30006	1.37547	1.0349	1.26548	1.49029	1.34973	1.26883	1.12939	1.06638
Observer71	2.17262	3.74405	2.68381	2.15292	2.1161	3.66037	1.33493	1.9656	1.53763	1.44051				1.53763	1.44051	1.33493	1.9656	2.1161	3.66037	2.68381	2.15292	2.17262	3.74405
Observer72	2.81174	6.97315	2.07236	.	3.35273	2.21522	2.14583	1.8018	1.82257	1.87206				1.82257	1.87206	2.14583	1.8018	3.35273	2.21522	2.07236	.	2.81174	6.97315
Observer73	2.15705	2.11	2.53935	2.89393	2.10882	2.96401	2.09187	3.08942	1.9356	2.4233				1.9356	2.4233	2.09187	3.08942	2.10882	2.96401	2.53935	2.89393	2.15705	2.11
Observer74	3.62676	.	3.6589	.	2.09721	5.7564	2.52827	4.22762	1.55468	2.44962				1.55468	2.44962	2.52827	4.22762	2.09721	5.7564	3.6589	.	3.62676	.
Observer75	4.42695	2.6202	4.3313	4.60125	3.14907	3.4477	3.44776	3.98587	1.77265	1.80079				1.77265	1.80079	3.44776	3.98587	3.14907	3.4477	4.3313	4.60125	4.42695	2.6202
Observer76	1.49214	.	2.00379	1.49782	2.84226	2.63758	2.45191	2.1024	1.62579	1.31046				1.62579	1.31046	2.45191	2.1024	2.84226	2.63758	2.00379	1.49782	1.49214	.
Observer77	1.50712	.	2.29076	.	2.38306	6.89511	1.67239	4.06392	1.52846	2.14511				1.52846	2.14511	1.67239	4.06392	2.38306	6.89511	2.29076	.	1.50712	.
Observer78	1.27528	2.7301	1.28026	1.52893	1.51788	1.5211	1.51698	2.16854	1.72628	1.80982				1.72628	1.80982	1.51698	2.16854	1.51788	1.5211	1.28026	1.52893	1.27528	2.7301
Observer79	0.944487	0.795845	0.944466	1.09207	1.18485	1.326	1.37156	1.47434	1.3212	2.1919				1.3212	2.1919	1.37156	1.47434	1.18485	1.326	0.944466	1.09207	0.944487	0.795845
Observer80	1.00996	1.01408	1.14828	1.52134	1.1979	1.02471	1.55062	1.14673	1.19809	1.18071				1.19809	1.18071	1.55062	1.14673	1.1979	1.02471	1.14828	1.52134	1.00996	1.01408
	Time Pressure					Time Passage
	10	8	6	4	2	1	2	3	4	5
Match	2.7878	2.79998	2.43055	2.07136	1.51769	2.40436	2.52596	2.43055	2.34537	1.90114
Mismatch	3.74001	3.71651	3.2074	2.48776	1.60914	2.93716	3.41674	3.2074	2.74115	2.4086
SE	0.177111	0.35961	0.147973	0.308477	0.112656	0.229724	0.0768937	0.156068	0.0363511	0.0654773
	0.177175	0.338934	0.14853	0.292111	0.113633	0.229724	0.0778612	0.156068	0.0367637	0.0654773

## Sheet: Exp1_SDT
	Time Pressure													Time Passage
	d'					criterion								d'prime					criterion
	10	8	6	4	2	10	8	6	4	2				1	2	3	4	5	1	2	3	4	5
Observer01	1.53317	1.17603	0.28155	-0.0380986	-0.0380986	-0.335857	-1.01874	-1.78563	-1.6258	-1.6258				1.53317	1.17603	0.28155	-0.0380986	-0.0380986	-0.335857	-1.01874	-1.78563	-1.6258	-1.6258
Observer02	1.9546	0.265181	-0.948946	-0.0380986	0.554883	0.667556	-0.563318	-1.17038	-1.6258	-0.708169				1.9546	0.265181	-0.948946	-0.0380986	0.554883	0.667556	-0.563318	-1.17038	-1.6258	-0.708169
Observer03	0.812402	2.17704	0.265181	0.554883	0.265181	0.0245263	0.556332	-0.563318	-0.708169	-0.563318				0.812402	2.17704	0.265181	0.554883	0.265181	0.0245263	0.556332	-0.563318	-0.708169	-0.563318
Observer04	0.450161	0.671713	1.66738	0.967109	2.35713	-0.655808	-0.766584	-0.402962	-0.914282	-0.747838				0.450161	0.671713	1.66738	0.967109	2.35713	-0.655808	-0.766584	-0.402962	-0.914282	-0.747838
Observer05	1.21576	1.49568	-0.247017	0.28155	0	-0.177154	-1.17857	-1.52135	-1.78563	-1.64485				1.21576	1.49568	-0.247017	0.28155	0	-0.177154	-1.17857	-1.52135	-1.78563	-1.64485
Observer06	1.21576	1.53317	0.450161	2.88151	0.450161	-0.177154	-0.335857	-0.655808	0.204101	-0.655808				1.21576	1.53317	0.450161	2.88151	0.450161	-0.177154	-0.335857	-0.655808	0.204101	-0.655808
Observer07	0.74047	0.024913	0.554883	2.25685	1.41634	0.0604924	-0.443184	-0.708169	0.516429	-0.277442				0.74047	0.024913	0.554883	2.25685	1.41634	0.0604924	-0.443184	-0.708169	0.516429	-0.277442
Observer08	2.74729	1.49568	-0.0380986	-0.247017	0.28155	0.271207	-1.17857	-1.6258	-1.52135	-1.78563				2.74729	1.49568	-0.0380986	-0.247017	0.28155	0.271207	-1.17857	-1.6258	-1.52135	-1.78563
Observer09	0.948946	1.40547	1.26318	0.600912	0.74047	1.17038	0.942117	1.01326	0.130271	0.0604924				0.948946	1.40547	1.26318	0.600912	0.74047	1.17038	0.942117	1.01326	0.130271	0.0604924
Observer10	3.25161	0.671713	2.88151	0.967109	-0.408201	0.0190493	-0.766584	0.204101	-0.914282	-1.44075				3.25161	0.671713	2.88151	0.967109	-0.408201	0.0190493	-0.766584	0.204101	-0.914282	-1.44075
Observer11	1.67873	0.962917	1.04272	0.962917	0.554883	0.805487	-0.0507312	-0.0906342	-0.0507312	-0.708169				1.67873	0.962917	1.04272	0.962917	0.554883	0.805487	-0.0507312	-0.0906342	-0.0507312	-0.708169
Observer12	2.74729	0.101462	0.554883	0.671713	-0.0380986	0.271207	-0.481459	-0.708169	-0.766584	-1.6258				2.74729	0.101462	0.554883	0.671713	-0.0380986	0.271207	-0.481459	-0.708169	-0.766584	-1.6258
Observer13	1.53317	1.82856	1.41634	2.35713	1.49568	-0.335857	-0.483555	-0.277442	-0.747838	-1.17857				1.53317	1.82856	1.41634	2.35713	1.49568	-0.335857	-0.483555	-0.277442	-0.747838	-1.17857
Observer14	2.88151	1.49568	3.57126	0.28155	1.21413	0.204101	-1.17857	-0.140775	-1.78563	-1.03779				2.88151	1.49568	3.57126	0.28155	1.21413	0.204101	-1.17857	-0.140775	-1.78563	-1.03779
Observer15	1.74665	1.81504	1.74665	0.962917	0.886368	0.771529	0.737334	0.771529	-0.0507312	-0.0124565				1.74665	1.81504	1.74665	0.962917	0.886368	0.771529	0.737334	0.771529	-0.0507312	-0.0124565
Observer16	-0.260543	0.354309	0.886368	1.31162	2.63046	-0.300456	-0.607882	-0.0124565	-0.22508	0.329622				-0.260543	0.354309	0.886368	1.31162	2.63046	-0.300456	-0.607882	-0.0124565	-0.22508	0.329622
Observer17	1.31162	2.03748	1.17603	0	-0.0380986	-0.22508	-0.588014	-1.01874	-1.64485	-1.6258				1.31162	2.03748	1.17603	0	-0.0380986	-0.22508	-0.588014	-1.01874	-1.64485	-1.6258
Observer18	1.53317	0.671713	0.967109	2.35713	1.21413	-0.335857	-0.766584	-0.914282	-0.747838	-1.03779				1.53317	0.671713	0.967109	2.35713	1.21413	-0.335857	-0.766584	-0.914282	-0.747838	-1.03779
Observer19	0.450161	-0.120985	1.88423	-0.659243	0.024913	-0.655808	-0.370235	0.702737	-1.31523	-0.443184				0.450161	-0.120985	1.88423	-0.659243	0.024913	-0.655808	-0.370235	0.702737	-1.31523	-0.443184
Observer20	1.12664	2.63046	0.812402	2.52574	1.41634	-0.13259	0.329622	0.0245263	0.381983	-0.277442				1.12664	2.63046	0.812402	2.52574	1.41634	-0.13259	0.329622	0.0245263	0.381983	-0.277442
Observer21	0.600912	0.396847	2.10049	-1.74665	1.74665	0.130271	0.232304	0.594607	-0.771529	0.771529				0.600912	0.396847	2.10049	-1.74665	1.74665	0.130271	0.232304	0.594607	-0.771529	0.771529
Observer22	2.42989	0.962917	1.31162	0.671713	-0.0380986	0.429909	-0.0507312	-0.22508	-0.766584	-1.6258				2.42989	0.962917	1.31162	0.671713	-0.0380986	0.429909	-0.0507312	-0.22508	-0.766584	-1.6258
Observer23	0.812402	0.670107	2.52574	1.21576	2.42989	0.0245263	0.0956736	0.381983	-0.177154	0.429909				0.812402	0.670107	2.52574	1.21576	2.42989	0.0245263	0.0956736	0.381983	-0.177154	0.429909
Observer24	2.52574	1.04272	2.52574	1.66738	2.63046	0.381983	-0.0906342	0.381983	-0.402962	0.329622				2.52574	1.04272	2.52574	1.66738	2.63046	0.381983	-0.0906342	0.381983	-0.402962	0.329622
Observer25	0.024913	2.42989	-1.18921	0.962917	0.962917	-0.443184	0.429909	-1.05025	-0.0507312	-0.0507312				0.024913	2.42989	-1.18921	0.962917	0.962917	-0.443184	0.429909	-1.05025	-0.0507312	-0.0507312
Observer26	1.61097	0.812402	0.450161	1.66738	0.962917	0.839367	0.0245263	-0.655808	-0.402962	-0.0507312				1.61097	0.812402	0.450161	1.66738	0.962917	0.839367	0.0245263	-0.655808	-0.402962	-0.0507312
Observer27	2.63046	1.12664	0.101462	0.354309	1.31162	0.329622	-0.13259	-0.481459	-0.607882	-0.22508				2.63046	1.12664	0.101462	0.354309	1.31162	0.329622	-0.13259	-0.481459	-0.607882	-0.22508
Observer28	1.04272	0.181268	1.12664	-0.948946	1.31162	-0.0906342	-0.521362	-0.13259	-1.17038	-0.22508				1.04272	0.181268	1.12664	-0.948946	1.31162	-0.0906342	-0.521362	-0.13259	-1.17038	-0.22508
Observer29	2.25685	0.962917	1.21576	2.42989	0.181268	0.516429	-0.0507312	-0.177154	0.429909	-0.521362				2.25685	0.962917	1.21576	2.42989	0.181268	0.516429	-0.0507312	-0.177154	0.429909	-0.521362
Observer30	1.9546	2.34076	2.17704	1.12664	0.101462	0.667556	0.474473	0.556332	-0.13259	-0.481459				1.9546	2.34076	2.17704	1.12664	0.101462	0.667556	0.474473	0.556332	-0.13259	-0.481459
Observer31	0.886368	1.53317	1.66738	1.66738	1.82856	-0.0124565	-0.335857	-0.402962	-0.402962	-0.483555				0.886368	1.53317	1.66738	1.66738	1.82856	-0.0124565	-0.335857	-0.402962	-0.402962	-0.483555
Observer32	2.10049	0.812402	1.12664	0.962917	1.04272	0.594607	0.0245263	-0.13259	-0.0507312	-0.0906342				2.10049	0.812402	1.12664	0.962917	1.04272	0.594607	0.0245263	-0.13259	-0.0507312	-0.0906342
Observer33	1.53317	0.554883	1.21576	-1.11266	0.805925	-0.335857	-0.708169	-0.177154	-1.08852	-0.83369				1.53317	0.554883	1.21576	-1.11266	0.805925	-0.335857	-0.708169	-0.177154	-1.08852	-0.83369
Observer34	2.42989	2.63046	1.53317	1.66738	1.41634	0.429909	0.329622	-0.335857	-0.402962	-0.277442				2.42989	2.63046	1.53317	1.66738	1.41634	0.429909	0.329622	-0.335857	-0.402962	-0.277442
Observer35	1.54306	1.54306	1.74665	1.47467	-0.600912	0.873325	0.873325	0.771529	0.907519	-0.130271				1.54306	1.54306	1.74665	1.47467	-0.600912	0.873325	0.873325	0.771529	0.907519	-0.130271
Observer36	2.10049	2.42989	1.21576	0.74047	2.52574	0.594607	0.429909	-0.177154	0.0604924	0.381983				2.10049	2.42989	1.21576	0.74047	2.52574	0.594607	0.429909	-0.177154	0.0604924	0.381983
Observer37	-0.120985	0.886368	2.17704	0.962917	1.21576	-0.370235	-0.0124565	0.556332	-0.0507312	-0.177154				-0.120985	0.886368	2.17704	0.962917	1.21576	-0.370235	-0.0124565	0.556332	-0.0507312	-0.177154
Observer38	0.805925	-0.247017	-0.542413	1.17603	0.28155	-0.83369	-1.52135	-1.37365	-1.01874	-1.78563				0.805925	-0.247017	-0.542413	1.17603	0.28155	-0.83369	-1.52135	-1.37365	-1.01874	-1.78563
Observer39	0.670107	0.74047	0.886368	0.101462	0.962917	0.0956736	0.0604924	-0.0124565	-0.481459	-0.0507312				0.670107	0.74047	0.886368	0.101462	0.962917	0.0956736	0.0604924	-0.0124565	-0.481459	-0.0507312
Observer40	2.34076	2.25685	0.354309	0.265181	0.805925	0.474473	0.516429	-0.607882	-0.563318	-0.83369				2.34076	2.25685	0.354309	0.265181	0.805925	0.474473	0.516429	-0.607882	-0.563318	-0.83369
Observer41	2.34076	0.812402	2.10049	0.962917	1.88423	0.474473	0.0245263	0.594607	-0.0507312	0.702737				1.88423	0.962917	2.10049	0.812402	2.34076	0.702737	-0.0507312	0.594607	0.0245263	0.474473
Observer42	-0.408201	-0.948946	1.04272	-1.11266	0.328932	-1.44075	-1.17038	-0.0906342	-1.08852	0.266261				0.328932	-1.11266	1.04272	-0.948946	-0.408201	0.266261	-1.08852	-0.0906342	-1.17038	-1.44075
Observer43	2.42989	0.181268	1.53317	0.181268	0.74047	0.429909	-0.521362	-0.335857	-0.521362	0.0604924				0.74047	0.181268	1.53317	0.181268	2.42989	0.0604924	-0.521362	-0.335857	-0.521362	0.429909
Observer44	3.04269	0.265181	2.63046	0.024913	2.10049	0.123509	-0.563318	0.329622	-0.443184	0.594607				2.10049	0.024913	2.63046	0.265181	3.04269	0.594607	-0.443184	0.329622	-0.563318	0.123509
Observer45	2.35713	-0.408201	1.49568	2.03748	-0.859818	-0.747838	-1.44075	-1.17857	-0.588014	-1.21494				-0.859818	2.03748	1.49568	-0.408201	2.35713	-1.21494	-0.588014	-1.17857	-1.44075	-0.747838
Observer46	0.671713	1.12664	1.21576	1.21576	2.02653	-0.766584	-0.13259	-0.177154	-0.177154	0.631589				2.02653	1.21576	1.21576	1.12664	0.671713	0.631589	-0.177154	-0.177154	-0.13259	-0.766584
Observer47	1.21576	0.671713	1.41634	2.17704	0.812402	-0.177154	-0.766584	-0.277442	0.556332	0.0245263				0.812402	2.17704	1.41634	0.671713	1.21576	0.0245263	0.556332	-0.277442	-0.766584	-0.177154
Observer48	1.40547	0.260543	0.600912	1.03286	-0.181268	0.942117	0.300456	0.130271	1.12842	0.521362				-0.181268	1.03286	0.600912	0.260543	1.40547	0.521362	1.12842	0.130271	0.300456	0.942117
Observer49	2.07558	2.74729	1.31162	0.671713	-0.763966	-0.607063	0.271207	-0.22508	-0.766584	-1.26287				-0.763966	0.671713	1.31162	2.74729	2.07558	-1.26287	-0.766584	-0.22508	0.271207	-0.607063
Observer50	0.28155	-0.247017	0.967109	1.17603	0.967109	-1.78563	-1.52135	-0.914282	-1.01874	-0.914282				0.967109	1.17603	0.967109	-0.247017	0.28155	-0.914282	-1.01874	-0.914282	-1.52135	-1.78563
Observer51	0.450161	-0.659243	1.49568	0.265181	1.9546	-0.655808	-1.31523	-1.17857	-0.563318	0.667556				1.9546	0.265181	1.49568	-0.659243	0.450161	0.667556	-0.563318	-1.17857	-1.31523	-0.655808
Observer52	1.17603	0.967109	0.554883	-0.542413	0.812402	-1.01874	-0.914282	-0.708169	-1.37365	0.0245263				0.812402	-0.542413	0.554883	0.967109	1.17603	0.0245263	-1.37365	-0.708169	-0.914282	-1.01874
Observer53	2.34076	1.04272	1.67873	0.181268	1.04272	0.474473	-0.0906342	0.805487	-0.521362	-0.0906342				1.04272	0.181268	1.67873	1.04272	2.34076	-0.0906342	-0.521362	0.805487	-0.0906342	0.474473
Observer54	0.74047	-0.859818	-0.542413	0.671713	-0.328932	0.0604924	-1.21494	-1.37365	-0.766584	-0.266261				-0.328932	0.671713	-0.542413	-0.859818	0.74047	-0.266261	-0.766584	-1.37365	-1.21494	0.0604924
Observer55	2.03748	0.554883	2.74729	2.17704	2.10049	-0.588014	-0.708169	0.271207	0.556332	0.594607				2.10049	2.17704	2.74729	0.554883	2.03748	0.594607	0.556332	0.271207	-0.708169	-0.588014
Observer56	-0.247017	1.17603	0.354309	2.02653	-0.464607	-1.52135	-1.01874	-0.607882	0.631589	-0.198424				-0.464607	2.02653	0.354309	1.17603	-0.247017	-0.198424	0.631589	-0.607882	-1.01874	-1.52135
Observer57	0.812402	-0.396847	0.260543	1.61097	-1.67873	0.0245263	-0.232304	0.300456	0.839367	-0.805487				-1.67873	1.61097	0.260543	-0.396847	0.812402	-0.805487	0.839367	0.300456	-0.232304	0.0245263
Observer58	-0.659243	1.66738	-0.659243	-0.191347	-0.0490526	-1.31523	-0.402962	-1.31523	-0.335054	-0.406201				-0.0490526	-0.191347	-0.659243	1.66738	-0.659243	-0.406201	-0.335054	-1.31523	-0.402962	-1.31523
Observer59	-0.0380986	1.12664	1.31162	1.04272	2.10049	-1.6258	-0.13259	-0.22508	-0.0906342	0.594607				2.10049	1.04272	1.31162	1.12664	-0.0380986	0.594607	-0.0906342	-0.22508	-0.13259	-1.6258
Observer60	1.11266	1.26318	1.03286	1.18921	1.40547	1.08852	1.01326	1.12842	1.05025	0.942117				1.40547	1.18921	1.03286	1.26318	1.11266	0.942117	1.05025	1.12842	1.01326	1.08852
Observer61	0.812402	2.02653	0.962917	0.532523	0.464607	0.0245263	0.631589	-0.0507312	0.164466	0.198424				0.464607	0.532523	0.962917	2.02653	0.812402	0.198424	0.164466	-0.0507312	0.631589	0.0245263
Observer62	0.554883	2.63046	0.805925	0.886368	0.886368	-0.708169	0.329622	-0.83369	-0.0124565	-0.0124565				0.886368	0.886368	0.805925	2.63046	0.554883	-0.0124565	-0.0124565	-0.83369	0.329622	-0.708169
Observer63	1.04272	1.9546	2.25685	2.02653	1.61097	-0.0906342	0.667556	0.516429	0.631589	0.839367				1.61097	2.02653	2.25685	1.9546	1.04272	0.839367	0.631589	0.516429	0.667556	-0.0906342
Observer64	0.812402	2.25685	1.31162	0.74047	-0.191347	0.0245263	0.516429	-0.22508	0.0604924	-0.335054				-0.191347	0.74047	1.31162	2.25685	0.812402	-0.335054	0.0604924	-0.22508	0.516429	0.0245263
Observer65	2.52574	0.554883	-0.859818	0.181268	0.812402	0.381983	-0.708169	-1.21494	-0.521362	0.0245263				0.812402	0.181268	-0.859818	0.554883	2.52574	0.0245263	-0.521362	-1.21494	-0.708169	0.381983
Observer66	0.948946	-0.354309	0.859818	0.542413	0.948946	1.17038	0.607882	1.21494	1.37365	1.17038				0.948946	0.542413	0.859818	-0.354309	0.948946	1.17038	1.37365	1.21494	0.607882	1.17038
Observer67	1.9546	2.42989	1.21576	0.354309	2.42989	0.667556	0.429909	-0.177154	-0.607882	0.429909				2.42989	0.354309	1.21576	2.42989	1.9546	0.429909	-0.607882	-0.177154	0.429909	0.667556
Observer68	1.12664	1.17603	0.554883	1.12664	0.886368	-0.13259	-1.01874	-0.708169	-0.13259	-0.0124565				0.886368	1.12664	0.554883	1.17603	1.12664	-0.0124565	-0.13259	-0.708169	-1.01874	-0.13259
Observer69	2.63046	0.962917	1.41634	1.04272	1.61097	0.329622	-0.0507312	-0.277442	-0.0906342	0.839367				1.61097	1.04272	1.41634	0.962917	2.63046	0.839367	-0.0906342	-0.277442	-0.0507312	0.329622
Observer70	2.88151	2.17704	0.812402	2.25685	1.74665	0.204101	0.556332	0.0245263	0.516429	0.771529				1.74665	2.25685	0.812402	2.17704	2.88151	0.771529	0.516429	0.0245263	0.556332	0.204101
Observer71	1.04272	0.024913	2.10049	0.396847	1.74665	-0.0906342	-0.443184	0.594607	0.232304	0.771529				1.74665	0.396847	2.10049	0.024913	1.04272	0.771529	0.232304	0.594607	-0.443184	-0.0906342
Observer72	1.82856	0.28155	3.25161	1.66738	1.21576	-0.483555	-1.78563	0.0190493	-0.402962	-0.177154				1.21576	1.66738	3.25161	0.28155	1.82856	-0.177154	-0.402962	0.0190493	-1.78563	-0.483555
Observer73	1.41634	1.41634	1.31162	0.812402	1.54306	-0.277442	-0.277442	-0.22508	0.0245263	0.873325				1.54306	0.812402	1.31162	1.41634	1.41634	0.873325	0.0245263	-0.22508	-0.277442	-0.277442
Observer74	0.28155	-0.0380986	0.671713	1.31162	0.74047	-1.78563	-1.6258	-0.766584	-0.22508	0.0604924				0.74047	1.31162	0.671713	-0.0380986	0.28155	0.0604924	-0.22508	-0.766584	-1.6258	-1.78563
Observer75	1.41634	1.04272	1.41634	0.120985	1.47467	-0.277442	-0.0906342	-0.277442	0.370235	0.907519				1.47467	0.120985	1.41634	1.04272	1.41634	0.907519	0.370235	-0.277442	-0.0906342	-0.277442
Observer76	-0.408201	0.554883	1.53317	2.63046	0.554883	-1.44075	-0.708169	-0.335857	0.329622	-0.708169				0.554883	2.63046	1.53317	0.554883	-0.408201	-0.708169	0.329622	-0.335857	-0.708169	-1.44075
Observer77	0	0.28155	1.17603	1.82856	1.41634	-1.64485	-1.78563	-1.01874	-0.483555	-0.277442				1.41634	1.82856	1.17603	0.28155	0	-0.277442	-0.483555	-1.01874	-1.78563	-1.64485
Observer78	2.07558	0.967109	1.21576	0.101462	1.04272	-0.607063	-0.914282	-0.177154	-0.481459	-0.0906342				1.04272	0.101462	1.21576	0.967109	2.07558	-0.0906342	-0.481459	-0.177154	-0.914282	-0.607063
Observer79	0.354309	1.31162	-0.464607	1.21576	0.670107	-0.607882	-0.22508	-0.198424	-0.177154	0.0956736				0.670107	1.21576	-0.464607	1.31162	0.354309	0.0956736	-0.177154	-0.198424	-0.22508	-0.607882
Observer80	1.66738	1.12664	2.25685	1.04272	1.67873	-0.402962	-0.13259	0.516429	-0.0906342	0.805487				1.67873	1.04272	2.25685	1.12664	1.66738	0.805487	-0.0906342	0.516429	-0.13259	-0.402962
	Time Pressure					Time Passage								Time Pressure					Time Passage
	10	8	6	4	2	1	2	3	4	5				10	8	6	4	2	1	2	3	4	5
d'	1.34875	0.99859	1.12835	0.89851	0.926307	1.21296	1.05471	1.12835	0.842391	1.0621			criterion	-0.114359	-0.308865	-0.252838	-0.31758	-0.203706	0.148377	-0.140135	-0.252838	-0.48631	-0.466442
SE	0.104028	0.099232	0.104833	0.103825	0.0996017	0.105406	0.0910368	0.104833	0.110077	0.103041			SE	0.0780342	0.0759611	0.0743328	0.0769	0.0832279	0.0609393	0.0682468	0.0743328	0.0791712	0.0834309

## Sheet: Exp2_Acc
	Time Pressure											Time Passage
	8 seconds		6 seconds		4 seconds		2 seconds					Block 1		Block 2		Block 3		Block 4
	Match	Mismatch	Match	Mismatch	Match	Mismatch	Match	Mismatch				Match	Mismatch	Match	Mismatch	Match	Mismatch	Match	Mismatch
Observer01	76.087	75	76.087	75	84.7826	50	80.4348	100				76.087	75	76.087	75	84.7826	50	80.4348	100
Observer02	47.8261	100	60.8696	100	78.2609	25	84.7826	50				47.8261	100	60.8696	100	78.2609	25	84.7826	50
Observer03	73.913	25	65.2174	50	65.2174	25	69.5652	25				73.913	25	65.2174	50	65.2174	25	69.5652	25
Observer04	65.2174	50	69.5652	50	76.087	50	78.2609	100				65.2174	50	69.5652	50	76.087	50	78.2609	100
Observer05	65.2174	100	65.2174	50	69.5652	100	67.3913	25				65.2174	100	65.2174	50	69.5652	100	67.3913	25
Observer06	82.6087	75	82.6087	100	91.3043	50	97.8261	0				82.6087	75	82.6087	100	91.3043	50	97.8261	0
Observer07	71.7391	50	84.7826	25	69.5652	75	84.7826	50				71.7391	50	84.7826	25	69.5652	75	84.7826	50
Observer08	65.2174	100	63.0435	75	69.5652	100	56.5217	75				65.2174	100	63.0435	75	69.5652	100	56.5217	75
Observer09	39.1304	25	41.3043	50	58.6957	50	52.1739	75				39.1304	25	41.3043	50	58.6957	50	52.1739	75
Observer10	54.3478	75	54.3478	100	78.2609	100	67.3913	50				54.3478	75	54.3478	100	78.2609	100	67.3913	50
Observer11	71.7391	50	71.7391	100	65.2174	50	73.913	50				71.7391	50	71.7391	100	65.2174	50	73.913	50
Observer12	73.913	50	78.2609	50	89.1304	25	82.6087	25				73.913	50	78.2609	50	89.1304	25	82.6087	25
Observer13	63.0435	75	63.0435	75	56.5217	100	60.8696	25				63.0435	75	63.0435	75	56.5217	100	60.8696	25
Observer14	60.8696	100	80.4348	75	67.3913	50	78.2609	25				60.8696	100	80.4348	75	67.3913	50	78.2609	25
Observer15	86.9565	50	89.1304	50	82.6087	50	89.1304	50				86.9565	50	89.1304	50	82.6087	50	89.1304	50
Observer16	50	75	56.5217	100	73.913	25	67.3913	50				50	75	56.5217	100	73.913	25	67.3913	50
Observer17	69.5652	50	91.3043	75	89.1304	25	93.4783	25				69.5652	50	91.3043	75	89.1304	25	93.4783	25
Observer18	78.2609	75	69.5652	25	63.0435	0	84.7826	50				78.2609	75	69.5652	25	63.0435	0	84.7826	50
Observer19	69.5652	75	69.5652	100	67.3913	75	73.913	50				69.5652	75	69.5652	100	67.3913	75	73.913	50
Observer20	63.0435	50	60.8696	50	69.5652	50	67.3913	75				63.0435	50	60.8696	50	69.5652	50	67.3913	75
Observer21	78.2609	75	86.9565	50	84.7826	50	91.3043	75				78.2609	75	86.9565	50	84.7826	50	91.3043	75
Observer22	76.087	75	71.7391	75	78.2609	75	69.5652	75				76.087	75	71.7391	75	78.2609	75	69.5652	75
Observer23	78.2609	50	80.4348	75	78.2609	75	76.087	0				78.2609	50	80.4348	75	78.2609	75	76.087	0
Observer24	43.4783	100	50	75	60.8696	75	45.6522	75				43.4783	100	50	75	60.8696	75	45.6522	75
Observer25	67.3913	75	82.6087	50	91.3043	0	89.1304	50				67.3913	75	82.6087	50	91.3043	0	89.1304	50
Observer26	58.6957	75	63.0435	75	69.5652	75	69.5652	25				58.6957	75	63.0435	75	69.5652	75	69.5652	25
Observer27	56.5217	75	82.6087	75	80.4348	25	91.3043	50				56.5217	75	82.6087	75	80.4348	25	91.3043	50
Observer28	47.8261	100	34.7826	75	54.3478	100	50	75				47.8261	100	34.7826	75	54.3478	100	50	75
Observer29	52.1739	75	60.8696	75	67.3913	50	71.7391	75				52.1739	75	60.8696	75	67.3913	50	71.7391	75
Observer30	78.2609	25	78.2609	25	89.1304	50	93.4783	25				78.2609	25	78.2609	25	89.1304	50	93.4783	25
Observer31	80.4348	50	71.7391	50	78.2609	50	50	25				50	25	78.2609	50	71.7391	50	80.4348	50
Observer32	65.2174	100	67.3913	100	60.8696	50	60.8696	100				60.8696	100	60.8696	50	67.3913	100	65.2174	100
Observer33	52.1739	75	47.8261	100	56.5217	75	52.1739	50				52.1739	50	56.5217	75	47.8261	100	52.1739	75
Observer34	95.6522	25	93.4783	25	86.9565	25	76.087	25				76.087	25	86.9565	25	93.4783	25	95.6522	25
Observer35	82.6087	25	78.2609	50	91.3043	25	67.3913	50				67.3913	50	91.3043	25	78.2609	50	82.6087	25
Observer36	78.2609	50	84.7826	50	78.2609	25	78.2609	100				78.2609	100	78.2609	25	84.7826	50	78.2609	50
Observer37	71.7391	50	60.8696	100	71.7391	50	69.5652	50				69.5652	50	71.7391	50	60.8696	100	71.7391	50
Observer38	71.7391	100	45.6522	100	58.6957	75	54.3478	100				54.3478	100	58.6957	75	45.6522	100	71.7391	100
Observer39	41.3043	100	45.6522	75	41.3043	50	69.5652	75				69.5652	75	41.3043	50	45.6522	75	41.3043	100
Observer40	93.4783	50	80.4348	75	84.7826	25	84.7826	50				84.7826	50	84.7826	25	80.4348	75	93.4783	50
Observer41	76.087	75	65.2174	50	60.8696	75	41.3043	75				41.3043	75	60.8696	75	65.2174	50	76.087	75
Observer42	97.8261	0	95.6522	0	84.7826	25	82.6087	0				82.6087	0	84.7826	25	95.6522	0	97.8261	0
Observer43	86.9565	75	89.1304	75	89.1304	25	82.6087	75				82.6087	75	89.1304	25	89.1304	75	86.9565	75
Observer44	69.5652	75	73.913	100	54.3478	75	56.5217	50				56.5217	50	54.3478	75	73.913	100	69.5652	75
Observer45	78.2609	50	69.5652	25	76.087	50	60.8696	50				60.8696	50	76.087	50	69.5652	25	78.2609	50
Observer46	45.6522	100	50	100	32.6087	100	39.1304	100				39.1304	100	32.6087	100	50	100	45.6522	100
Observer47	95.6522	25	95.6522	25	95.6522	0	80.4348	50				80.4348	50	95.6522	0	95.6522	25	95.6522	25
Observer48	76.087	50	78.2609	50	80.4348	75	78.2609	75				78.2609	75	80.4348	75	78.2609	50	76.087	50
Observer49	26.087	100	36.9565	75	50	100	65.2174	25				65.2174	25	50	100	36.9565	75	26.087	100
Observer50	63.0435	75	65.2174	50	45.6522	25	58.6957	100				58.6957	100	45.6522	25	65.2174	50	63.0435	75
Observer51	86.9565	25	84.7826	25	89.1304	25	84.7826	25				84.7826	25	89.1304	25	84.7826	25	86.9565	25
Observer52	91.3043	50	95.6522	50	84.7826	25	93.4783	75				93.4783	75	84.7826	25	95.6522	50	91.3043	50
Observer53	71.7391	75	76.087	50	84.7826	50	80.4348	50				80.4348	50	84.7826	50	76.087	50	71.7391	75
Observer54	69.5652	100	56.5217	100	58.6957	75	58.6957	100				58.6957	100	58.6957	75	56.5217	100	69.5652	100
Observer55	84.7826	50	91.3043	25	84.7826	50	65.2174	50				65.2174	50	84.7826	50	91.3043	25	84.7826	50
Observer56	97.8261	25	93.4783	50	84.7826	25	76.087	25				76.087	25	84.7826	25	93.4783	50	97.8261	25
Observer57	82.6087	25	78.2609	50	67.3913	75	82.6087	50				82.6087	50	67.3913	75	78.2609	50	82.6087	25
Observer58	100	25	93.4783	100	93.4783	75	91.3043	0				91.3043	0	93.4783	75	93.4783	100	100	25
Observer59	71.7391	75	58.6957	100	71.7391	100	43.4783	50				43.4783	50	71.7391	100	58.6957	100	71.7391	75
Observer60	76.087	50	78.2609	75	56.5217	75	71.7391	75				71.7391	75	56.5217	75	78.2609	75	76.087	50
	Tme Pressure				Time Passage
	8	6	4	2	1	2	3	4
Match	70.7609	71.4493	72.8986	71.9203	67.029	70.6522	73.6957	75.6522
Mismatch	63.3333	65.4167	53.75	53.75	62.9167	60	59.1667	54.1667
SE	2.05485	2.01287	1.82722	1.87755	1.75622	1.99155	1.83396	2.0111
	3.38589	3.41832	3.60599	3.60599	3.43892	3.37195	3.80337	3.57361

## Sheet: Exp2_RTs
	Time Pressure											Time Passage
	8 seconds		6 seconds		4 seconds		2 seconds					Block 1		Block 2		Block 3		Block 4
	Match	Mismatch	Match	Mismatch	Match	Mismatch	Match	Mismatch				Match	Mismatch	Match	Mismatch	Match	Mismatch	Match	Mismatch
Observer01	2.87848	3.1721	2.94387	2.50008	3.26299	1.68965	1.44155	1.3846				2.87848	3.1721	2.94387	2.50008	3.26299	1.68965	1.44155	1.3846
Observer02	3.21525	2.73902	4.00367	3.99119	2.23965	5.61576	1.32341	1.34173				3.21525	2.73902	4.00367	3.99119	2.23965	5.61576	1.32341	1.34173
Observer03	5.44042	6.58302	4.77932	4.88089	3.30096	4.05223	1.20769	3.68405				5.44042	6.58302	4.77932	4.88089	3.30096	4.05223	1.20769	3.68405
Observer04	3.48218	3.85891	2.9657	2.301	2.103	2.01255	1.23221	1.47659				3.48218	3.85891	2.9657	2.301	2.103	2.01255	1.23221	1.47659
Observer05	5.53472	5.47856	3.84236	2.2387	2.86957	3.00216	1.34086	2.09139				5.53472	5.47856	3.84236	2.2387	2.86957	3.00216	1.34086	2.09139
Observer06	3.21505	3.94136	1.74012	2.08658	1.34955	2.77687	0.793222	.				3.21505	3.94136	1.74012	2.08658	1.34955	2.77687	0.793222	.
Observer07	3.57297	3.43949	2.76673	1.79301	2.19311	3.13151	1.23845	0.980804				3.57297	3.43949	2.76673	1.79301	2.19311	3.13151	1.23845	0.980804
Observer08	4.04711	3.75962	3.78143	5.02323	2.40278	2.92877	1.22234	1.44571				4.04711	3.75962	3.78143	5.02323	2.40278	2.92877	1.22234	1.44571
Observer09	4.23958	1.63819	3.503	3.69719	2.54256	2.21533	1.21916	1.01919				4.23958	1.63819	3.503	3.69719	2.54256	2.21533	1.21916	1.01919
Observer10	2.77724	1.78886	2.91097	1.95388	2.17145	4.45607	1.33064	1.23264				2.77724	1.78886	2.91097	1.95388	2.17145	4.45607	1.33064	1.23264
Observer11	3.41601	2.25402	2.57196	6.70006	3.462	3.73619	1.4578	2.122				3.41601	2.25402	2.57196	6.70006	3.462	3.73619	1.4578	2.122
Observer12	6.64281	9.01461	4.50265	3.01011	2.43922	4.19626	1.43328	1.63469				6.64281	9.01461	4.50265	3.01011	2.43922	4.19626	1.43328	1.63469
Observer13	5.66909	6.36378	4.55822	3.19266	3.52373	2.77925	1.18317	1.87206				5.66909	6.36378	4.55822	3.19266	3.52373	2.77925	1.18317	1.87206
Observer14	2.42306	3.54889	2.34884	2.8191	1.86219	2.35864	1.3961	1.35132				2.42306	3.54889	2.34884	2.8191	1.86219	2.35864	1.3961	1.35132
Observer15	6.86104	8.84132	4.72308	3.70013	3.2871	3.94968	1.32847	1.82523				6.86104	8.84132	4.72308	3.70013	3.2871	3.94968	1.32847	1.82523
Observer16	2.75713	2.24194	2.44074	1.93428	1.341	1.68484	1.04969	1.06096				2.75713	2.24194	2.44074	1.93428	1.341	1.68484	1.04969	1.06096
Observer17	3.36638	3.31311	2.90864	3.85873	2.29326	2.18418	1.31323	1.6695				3.36638	3.31311	2.90864	3.85873	2.29326	2.18418	1.31323	1.6695
Observer18	6.39781	2.48038	4.67442	1.73172	3.41345	.	1.32057	2.66753				6.39781	2.48038	4.67442	1.73172	3.41345	.	1.32057	2.66753
Observer19	2.57332	1.90167	2.88535	2.69595	2.35161	2.48478	1.3902	1.46035				2.57332	1.90167	2.88535	2.69595	2.35161	2.48478	1.3902	1.46035
Observer20	1.32844	1.30271	1.38128	1.28722	1.32698	1.61476	1.02195	1.1694				1.32844	1.30271	1.38128	1.28722	1.32698	1.61476	1.02195	1.1694
Observer21	5.29816	7.81057	4.38946	7.80148	3.28992	1.72481	1.42606	1.70575				5.29816	7.81057	4.38946	7.80148	3.28992	1.72481	1.42606	1.70575
Observer22	2.02265	2.41287	2.31436	3.81153	1.40801	1.38323	1.31297	1.36242				2.02265	2.41287	2.31436	3.81153	1.40801	1.38323	1.31297	1.36242
Observer23	5.2419	7.29049	3.31294	4.48788	2.44908	3.12718	1.04179	.				5.2419	7.29049	3.31294	4.48788	2.44908	3.12718	1.04179	.
Observer24	2.4126	2.46843	2.07601	1.55988	1.965	1.05005	1.31558	0.987978				2.4126	2.46843	2.07601	1.55988	1.965	1.05005	1.31558	0.987978
Observer25	4.17771	3.19079	2.89897	4.49017	1.90136	.	1.09924	1.17809				4.17771	3.19079	2.89897	4.49017	1.90136	.	1.09924	1.17809
Observer26	3.40822	3.88422	2.95224	2.4284	2.08767	3.16681	1.21546	0.982979				3.40822	3.88422	2.95224	2.4284	2.08767	3.16681	1.21546	0.982979
Observer27	2.89713	2.66773	2.59661	3.26127	2.1543	4.68015	0.847497	1.63032				2.89713	2.66773	2.59661	3.26127	2.1543	4.68015	0.847497	1.63032
Observer28	4.52421	3.91569	4.32629	2.14247	2.52973	1.81752	1.22229	1.34166				4.52421	3.91569	4.32629	2.14247	2.52973	1.81752	1.22229	1.34166
Observer29	3.17729	3.87505	2.76363	3.69734	2.07847	1.78625	1.23081	1.37797				3.17729	3.87505	2.76363	3.69734	2.07847	1.78625	1.23081	1.37797
Observer30	1.82955	5.16366	1.72845	1.13876	1.69406	3.36187	1.15661	1.41974				1.82955	5.16366	1.72845	1.13876	1.69406	3.36187	1.15661	1.41974
Observer31	3.0235	7.03784	3.31902	4.54528	1.73429	1.14853	1.37793	1.21256				1.37793	1.21256	1.73429	1.14853	3.31902	4.54528	3.0235	7.03784
Observer32	1.7179	1.94619	1.68304	1.83246	1.21041	1.14677	1.09209	1.22082				1.09209	1.22082	1.21041	1.14677	1.68304	1.83246	1.7179	1.94619
Observer33	2.1607	1.95002	2.21713	2.09184	1.55979	1.85112	1.37372	1.57571				1.37372	1.57571	1.55979	1.85112	2.21713	2.09184	2.1607	1.95002
Observer34	2.01754	1.66945	1.58549	2.29309	1.46256	2.02832	1.67673	1.18998				1.67673	1.18998	1.46256	2.02832	1.58549	2.29309	2.01754	1.66945
Observer35	0.821102	1.43451	1.00272	1.27154	0.943755	1.3106	1.37772	1.42269				1.37772	1.42269	0.943755	1.3106	1.00272	1.27154	0.821102	1.43451
Observer36	3.14822	3.21935	2.32814	7.11353	2.03752	3.09648	1.29935	1.27581				1.29935	1.27581	2.03752	3.09648	2.32814	7.11353	3.14822	3.21935
Observer37	3.07001	4.91672	2.34536	4.13283	1.533	1.83307	1.44072	2.05145				1.44072	2.05145	1.533	1.83307	2.34536	4.13283	3.07001	4.91672
Observer38	3.9197	4.77416	4.64684	4.88673	2.49478	3.31801	1.47008	1.39334				1.47008	1.39334	2.49478	3.31801	4.64684	4.88673	3.9197	4.77416
Observer39	2.37073	1.59873	2.07167	1.99386	1.70219	1.69075	1.70179	1.83731				1.70179	1.83731	1.70219	1.69075	2.07167	1.99386	2.37073	1.59873
Observer40	1.45215	2.35399	1.21919	1.49926	1.41216	1.8253	1.29605	1.12132				1.29605	1.12132	1.41216	1.8253	1.21919	1.49926	1.45215	2.35399
Observer41	1.12905	1.32093	1.29423	1.98145	1.25886	1.16019	1.33872	1.14308				1.33872	1.14308	1.25886	1.16019	1.29423	1.98145	1.12905	1.32093
Observer42	0.751071	.	0.76421	.	0.757466	1.20127	0.860506	.				0.860506	.	0.757466	1.20127	0.76421	.	0.751071	.
Observer43	3.77977	5.79174	3.28805	6.83458	2.84051	1.73106	1.38522	1.79391				1.38522	1.79391	2.84051	1.73106	3.28805	6.83458	3.77977	5.79174
Observer44	4.51716	4.51923	2.9853	3.96685	2.01053	2.62583	1.1934	1.21701				1.1934	1.21701	2.01053	2.62583	2.9853	3.96685	4.51716	4.51923
Observer45	3.66114	3.97763	3.98055	2.01257	2.91043	2.04378	1.83604	2.41396				1.83604	2.41396	2.91043	2.04378	3.98055	2.01257	3.66114	3.97763
Observer46	1.85544	1.38476	1.55146	1.41586	1.53251	1.74765	1.31772	1.11837				1.31772	1.11837	1.53251	1.74765	1.55146	1.41586	1.85544	1.38476
Observer47	1.42074	2.96406	2.45661	6.24436	1.45663	.	1.31974	1.59104				1.31974	1.59104	1.45663	.	2.45661	6.24436	1.42074	2.96406
Observer48	1.63092	1.49776	1.6442	2.58188	1.53516	1.81997	1.28466	1.30527				1.28466	1.30527	1.53516	1.81997	1.6442	2.58188	1.63092	1.49776
Observer49	1.46923	0.924584	1.75475	1.57049	1.24607	1.32227	1.18481	0.967374				1.18481	0.967374	1.24607	1.32227	1.75475	1.57049	1.46923	0.924584
Observer50	3.68449	2.14774	2.43101	1.73224	3.15138	1.93445	1.43005	1.28316				1.43005	1.28316	3.15138	1.93445	2.43101	1.73224	3.68449	2.14774
Observer51	1.06052	1.48186	0.974725	2.01232	1.10479	1.20137	0.852686	1.0922				0.852686	1.0922	1.10479	1.20137	0.974725	2.01232	1.06052	1.48186
Observer52	1.27364	3.49845	1.23569	1.83314	1.22478	1.3105	1.251	1.59785				1.251	1.59785	1.22478	1.3105	1.23569	1.83314	1.27364	3.49845
Observer53	1.96767	2.02808	1.73786	2.15212	1.20209	2.09826	1.14172	2.2				1.14172	2.2	1.20209	2.09826	1.73786	2.15212	1.96767	2.02808
Observer54	1.53825	2.0093	1.78465	1.81343	1.89546	2.15845	1.37464	1.58736				1.37464	1.58736	1.89546	2.15845	1.78465	1.81343	1.53825	2.0093
Observer55	1.17416	1.73885	1.13309	1.49775	1.1176	1.68494	1.19918	1.09157				1.19918	1.09157	1.1176	1.68494	1.13309	1.49775	1.17416	1.73885
Observer56	1.40414	3.80627	1.24424	2.1296	1.19941	1.34179	1.15619	2.7303				1.15619	2.7303	1.19941	1.34179	1.24424	2.1296	1.40414	3.80627
Observer57	1.59336	2.96408	1.87353	1.80977	1.52762	2.09593	1.24265	1.39587				1.24265	1.39587	1.52762	2.09593	1.87353	1.80977	1.59336	2.96408
Observer58	3.30554	3.93137	3.62702	5.87375	2.23994	3.8532	1.37186	.				1.37186	.	2.23994	3.8532	3.62702	5.87375	3.30554	3.93137
Observer59	2.32672	5.83846	2.77165	5.77242	2.00542	2.04769	1.48921	1.30274				1.48921	1.30274	2.00542	2.04769	2.77165	5.77242	2.32672	5.83846
Observer60	2.96815	4.29781	2.02352	1.06556	2.19842	2.00214	1.30642	1.44053				1.30642	1.44053	2.19842	2.00214	2.02352	1.06556	2.96815	4.29781
	Tme Pressure				Time Passage
	8	6	4	2	1	2	3	4
Match	3.01734	2.64277	2.02999	1.27925	2.5745	2.43495	2.23781	1.72208
Mismatch	3.51466	3.08772	2.34381	1.51874	2.79161	2.55669	2.89347	2.28948
SE	0.194272	0.141987	0.0925145	0.0244612	0.211302	0.142064	0.106723	0.114608
	0.253066	0.21998	0.135969	0.0669101	0.262843	0.176455	0.20244	0.187107

## Sheet: Exp2_SDT
	Time Pressure											Time Passage
	d'				criterion							d'				criterion
	8	6	4	2	8	6	4	2				1	2	3	4	1	2	3	4
Observer01	1.38359	1.38359	1.02715	2.50211	-0.0173064	-0.0173064	-0.513577	0.3938				1.38359	1.38359	1.02715	2.50211	-0.0173064	-0.0173064	-0.513577	0.3938
Observer02	1.59033	1.92077	0.106544	1.02715	0.849686	0.684466	-0.727762	-0.513577				1.59033	1.92077	0.106544	1.02715	0.849686	0.684466	-0.727762	-0.513577
Observer03	-0.0338229	0.391196	-0.283293	-0.162554	-0.657578	-0.195598	-0.532843	-0.593213				-0.0338229	0.391196	-0.283293	-0.162554	-0.657578	-0.195598	-0.532843	-0.593213
Observer04	0.391196	0.511936	0.709103	2.42589	-0.195598	-0.255968	-0.354551	0.43191				0.391196	0.511936	0.709103	2.42589	-0.195598	-0.255968	-0.354551	0.43191
Observer05	2.03605	0.391196	2.15679	-0.223746	0.626829	-0.195598	0.566459	-0.562617				2.03605	0.391196	2.15679	-0.223746	0.626829	-0.195598	0.566459	-0.562617
Observer06	1.6133	2.58367	1.35974	0.374233	-0.132162	0.35302	-0.679869	-1.83197				1.6133	2.58367	1.35974	0.374233	-0.132162	0.35302	-0.679869	-1.83197
Observer07	0.575109	0.352665	1.18643	1.02715	-0.287555	-0.850822	0.0812768	-0.513577				0.575109	0.352665	1.18643	1.02715	-0.287555	-0.850822	0.0812768	-0.513577
Observer08	2.03605	1.00749	2.15679	0.838701	0.626829	0.170742	0.566459	0.255139				2.03605	1.00749	2.15679	0.838701	0.626829	0.170742	0.566459	0.255139
Observer09	-0.950411	-0.219723	0.219723	0.729009	-0.199284	0.109861	-0.109861	0.309985				-0.950411	-0.219723	0.219723	0.729009	-0.199284	0.109861	-0.109861	0.309985
Observer10	0.78369	1.75405	2.42589	0.450744	0.282645	0.767827	0.43191	-0.225372				0.78369	1.75405	2.42589	0.450744	0.282645	0.767827	0.43191	-0.225372
Observer11	0.575109	2.21996	0.391196	0.640667	-0.287555	0.534872	-0.195598	-0.320333				0.575109	2.21996	0.391196	0.640667	-0.287555	0.534872	-0.195598	-0.320333
Observer12	0.640667	0.781034	0.559005	0.264325	-0.320333	-0.390517	-0.953992	-0.806652				0.640667	0.781034	0.559005	0.264325	-0.320333	-0.390517	-0.953992	-0.806652
Observer13	1.00749	1.00749	1.80906	-0.398569	0.170742	0.170742	0.740321	-0.475205				1.00749	1.00749	1.80906	-0.398569	0.170742	0.170742	0.740321	-0.475205
Observer14	1.92077	1.53174	0.450744	0.106544	0.684466	-0.0913823	-0.225372	-0.727762				1.92077	1.53174	0.450744	0.106544	0.684466	-0.0913823	-0.225372	-0.727762
Observer15	1.12434	1.23349	0.938814	1.23349	-0.562169	-0.616747	-0.469407	-0.616747				1.12434	1.23349	0.938814	1.23349	-0.562169	-0.616747	-0.469407	-0.616747
Observer16	0.67449	1.80906	-0.0338229	0.450744	0.337245	0.740321	-0.657578	-0.225372				0.67449	1.80906	-0.0338229	0.450744	0.337245	0.740321	-0.657578	-0.225372
Observer17	0.511936	2.03423	0.559005	0.8379	-0.255968	-0.342624	-0.953992	-1.09344				0.511936	2.03423	0.559005	0.8379	-0.255968	-0.342624	-0.953992	-1.09344
Observer18	1.45552	-0.162554	-1.31185	1.02715	-0.053272	-0.593213	-0.988929	-0.513577				1.45552	-0.162554	-1.31185	1.02715	-0.053272	-0.593213	-0.988929	-0.513577
Observer19	1.18643	2.15679	1.12523	0.640667	0.0812768	0.566459	0.111873	-0.320333				1.18643	2.15679	1.12523	0.640667	0.0812768	0.566459	0.111873	-0.320333
Observer20	0.333005	0.275921	0.511936	1.12523	-0.166503	-0.137961	-0.255968	0.111873				0.333005	0.275921	0.511936	1.12523	-0.166503	-0.137961	-0.255968	0.111873
Observer21	1.45552	1.12434	1.02715	2.03423	-0.053272	-0.562169	-0.513577	-0.342624				1.45552	1.12434	1.02715	2.03423	-0.053272	-0.562169	-0.513577	-0.342624
Observer22	1.38359	1.2496	1.45552	1.18643	-0.0173064	0.0496902	-0.053272	0.0812768				1.38359	1.2496	1.45552	1.18643	-0.0173064	0.0496902	-0.053272	0.0812768
Observer23	0.781034	1.53174	1.45552	-0.935751	-0.390517	-0.0913823	-0.053272	-1.17698				0.781034	1.53174	1.45552	-0.935751	-0.390517	-0.0913823	-0.053272	-1.17698
Observer24	1.48064	0.67449	0.950411	0.565289	0.904532	0.337245	0.199284	0.391845				1.48064	0.67449	0.950411	0.565289	0.904532	0.337245	0.199284	0.391845
Observer25	1.12523	0.938814	-0.285116	1.23349	0.111873	-0.469407	-1.5023	-0.616747				1.12523	0.938814	-0.285116	1.23349	0.111873	-0.469407	-1.5023	-0.616747
Observer26	0.894213	1.00749	1.18643	-0.162554	0.227383	0.170742	0.0812768	-0.593213				0.894213	1.00749	1.18643	-0.162554	0.227383	0.170742	0.0812768	-0.593213
Observer27	0.838701	1.6133	0.182765	1.35974	0.255139	-0.132162	-0.765872	-0.679869				0.838701	1.6133	0.182765	1.35974	0.255139	-0.132162	-0.765872	-0.679869
Observer28	1.59033	0.283293	1.75405	0.67449	0.849686	0.532843	0.767827	0.337245				1.59033	0.283293	1.75405	0.67449	0.849686	0.532843	0.767827	0.337245
Observer29	0.729009	0.950411	0.450744	1.2496	0.309985	0.199284	-0.225372	0.0496902				0.729009	0.950411	0.450744	1.2496	0.309985	0.199284	-0.225372	0.0496902
Observer30	0.106544	0.106544	1.23349	0.8379	-0.727762	-0.727762	-0.616747	-1.09344				0.106544	0.106544	1.23349	0.8379	-0.727762	-0.727762	-0.616747	-1.09344
Observer31	0.857254	0.575109	0.781034	-0.67449	-0.428627	-0.287555	-0.390517	-0.337245				-0.67449	0.781034	0.575109	0.857254	-0.337245	-0.390517	-0.287555	-0.428627
Observer32	2.03605	2.0956	0.275921	1.92077	0.626829	0.597055	-0.137961	0.684466				1.92077	0.275921	2.0956	2.03605	0.684466	-0.137961	0.597055	0.626829
Observer33	0.729009	1.59033	0.838701	0.0545189	0.309985	0.849686	0.255139	-0.0272595				0.0545189	0.838701	1.59033	0.729009	-0.0272595	0.255139	0.849686	0.309985
Observer34	1.03719	0.8379	0.449848	0.0346128	-1.19308	-1.09344	-0.899414	-0.691796				0.0346128	0.449848	0.8379	1.03719	-0.691796	-0.899414	-1.09344	-1.19308
Observer35	0.264325	0.781034	0.685248	0.450744	-0.806652	-0.390517	-1.01711	-0.225372				0.450744	0.685248	0.781034	0.264325	-0.225372	-1.01711	-0.390517	-0.806652
Observer36	0.781034	1.02715	0.106544	2.42589	-0.390517	-0.513577	-0.727762	0.43191				2.42589	0.106544	1.02715	0.781034	0.43191	-0.727762	-0.513577	-0.390517
Observer37	0.575109	1.92077	0.575109	0.511936	-0.287555	0.684466	-0.287555	-0.255968				0.511936	0.575109	1.92077	0.575109	-0.255968	-0.287555	0.684466	-0.287555
Observer38	2.21996	1.53565	0.894213	1.75405	0.534872	0.877027	0.227383	0.767827				1.75405	0.894213	1.53565	2.21996	0.767827	0.227383	0.877027	0.534872
Observer39	1.42513	0.565289	-0.219723	1.18643	0.932288	0.391845	0.109861	0.0812768				1.18643	-0.219723	0.565289	1.42513	0.0812768	0.109861	0.391845	0.932288
Observer40	1.51239	1.53174	0.352665	1.02715	-0.756195	-0.0913823	-0.850822	-0.513577				1.02715	0.352665	1.53174	1.51239	-0.513577	-0.850822	-0.0913823	-0.756195
Observer41	1.38359	0.391196	0.950411	0.454767	-0.0173064	-0.195598	0.199284	0.447106				0.454767	0.950411	0.391196	1.38359	0.447106	0.199284	-0.195598	-0.0173064
Observer42	0.374233	0.0668217	0.352665	-0.706039	-1.83197	-1.67826	-0.850822	-1.29183				-0.706039	0.352665	0.0668217	0.374233	-1.29183	-0.850822	-1.67826	-1.83197
Observer43	1.79883	1.90798	0.559005	1.6133	-0.224924	-0.279502	-0.953992	-0.132162				1.6133	0.559005	1.90798	1.79883	-0.132162	-0.953992	-0.279502	-0.224924
Observer44	1.18643	2.28552	0.78369	0.164211	0.0812768	0.502093	0.282645	-0.0821054				0.164211	0.78369	2.28552	1.18643	-0.0821054	0.282645	0.502093	0.0812768
Observer45	0.781034	-0.162554	0.709103	0.275921	-0.390517	-0.593213	-0.354551	-0.137961				0.275921	0.709103	-0.162554	0.781034	-0.137961	-0.354551	-0.593213	-0.390517
Observer46	1.53565	1.64485	1.19411	1.36893	0.877027	0.822427	1.0478	0.960387				1.36893	1.19411	1.64485	1.53565	0.960387	1.0478	0.822427	0.877027
Observer47	1.03719	1.03719	0.0668217	0.857254	-1.19308	-1.19308	-1.67826	-0.428627				0.857254	0.0668217	1.03719	1.03719	-0.428627	-1.67826	-1.19308	-1.19308
Observer48	0.709103	0.781034	1.53174	1.45552	-0.354551	-0.390517	-0.0913823	-0.053272				1.45552	1.53174	0.781034	0.709103	-0.053272	-0.0913823	-0.390517	-0.354551
Observer49	1.00419	0.341485	1.64485	-0.283293	1.14276	0.503747	0.822427	-0.532843				-0.283293	1.64485	0.341485	1.00419	-0.532843	0.822427	0.503747	1.14276
Observer50	1.00749	0.391196	-0.78369	1.86458	0.170742	-0.195598	-0.282645	0.712565				1.86458	-0.78369	0.391196	1.00749	0.712565	-0.282645	-0.195598	0.170742
Observer51	0.449848	0.352665	0.559005	0.352665	-0.899414	-0.850822	-0.953992	-0.850822				0.352665	0.559005	0.352665	0.449848	-0.850822	-0.953992	-0.850822	-0.899414
Observer52	1.35974	1.71168	0.352665	2.18688	-0.679869	-0.855838	-0.850822	-0.41895				2.18688	0.352665	1.71168	1.35974	-0.41895	-0.850822	-0.855838	-0.679869
Observer53	1.2496	0.709103	1.02715	0.857254	0.0496902	-0.354551	-0.513577	-0.428627				0.857254	1.02715	0.709103	1.2496	-0.428627	-0.513577	-0.354551	0.0496902
Observer54	2.15679	1.80906	0.894213	1.86458	0.566459	0.740321	0.227383	0.712565				1.86458	0.894213	1.80906	2.15679	0.712565	0.227383	0.740321	0.566459
Observer55	1.02715	0.685248	1.02715	0.391196	-0.513577	-1.01711	-0.513577	-0.195598				0.391196	1.02715	0.685248	1.02715	-0.195598	-0.513577	-1.01711	-0.513577
Observer56	1.3446	1.51239	0.352665	0.0346128	-1.34679	-0.756195	-0.850822	-0.691796				0.0346128	0.352665	1.51239	1.3446	-0.691796	-0.850822	-0.756195	-1.34679
Observer57	0.264325	0.781034	1.12523	0.938814	-0.806652	-0.390517	0.111873	-0.469407				0.938814	1.12523	0.781034	0.264325	-0.469407	0.111873	-0.390517	-0.806652
Observer58	0.970364	3.15724	2.18688	-0.285116	-1.15967	0.066232	-0.41895	-1.5023				-0.285116	2.18688	3.15724	0.970364	-1.5023	-0.41895	0.066232	-1.15967
Observer59	1.2496	1.86458	2.21996	-0.164211	0.0496902	0.712565	0.534872	0.0821054				-0.164211	2.21996	1.86458	1.2496	0.0821054	0.534872	0.712565	0.0496902
Observer60	0.709103	1.45552	0.838701	1.2496	-0.354551	-0.053272	0.255139	0.0496902				1.2496	0.838701	1.45552	0.709103	0.0496902	0.255139	-0.053272	-0.354551
	Tme Pressure				Time Passage							Tme Pressure				Time Passage
	8	6	4	2	1	2	3	4				8	6	4	2	1	2	3	4
d'	1.03793	1.12713	0.796785	0.769046	0.873712	0.912933	1.01098	0.933267			criterion	-0.104995	-0.0785932	-0.272563	-0.263625	-0.0390574	-0.147221	-0.203935	-0.329562
SE	0.0763903	0.09566	0.0936334	0.104485	0.0991982	0.090342	0.102955	0.0865734			SE	0.0804784	0.0754496	0.0750059	0.0737426	0.0680733	0.0714639	0.0806414	0.0823336
